# Supplementary material for: Optimization of In Vitro Germination, Viability Tests and Storage of Paeonia ostii Pollen
Source: MDPI journal article supplement (doi:10.3390/plants12132460), 2023-06-27
Supplement: s1 [file s1]

Supplementary Materials

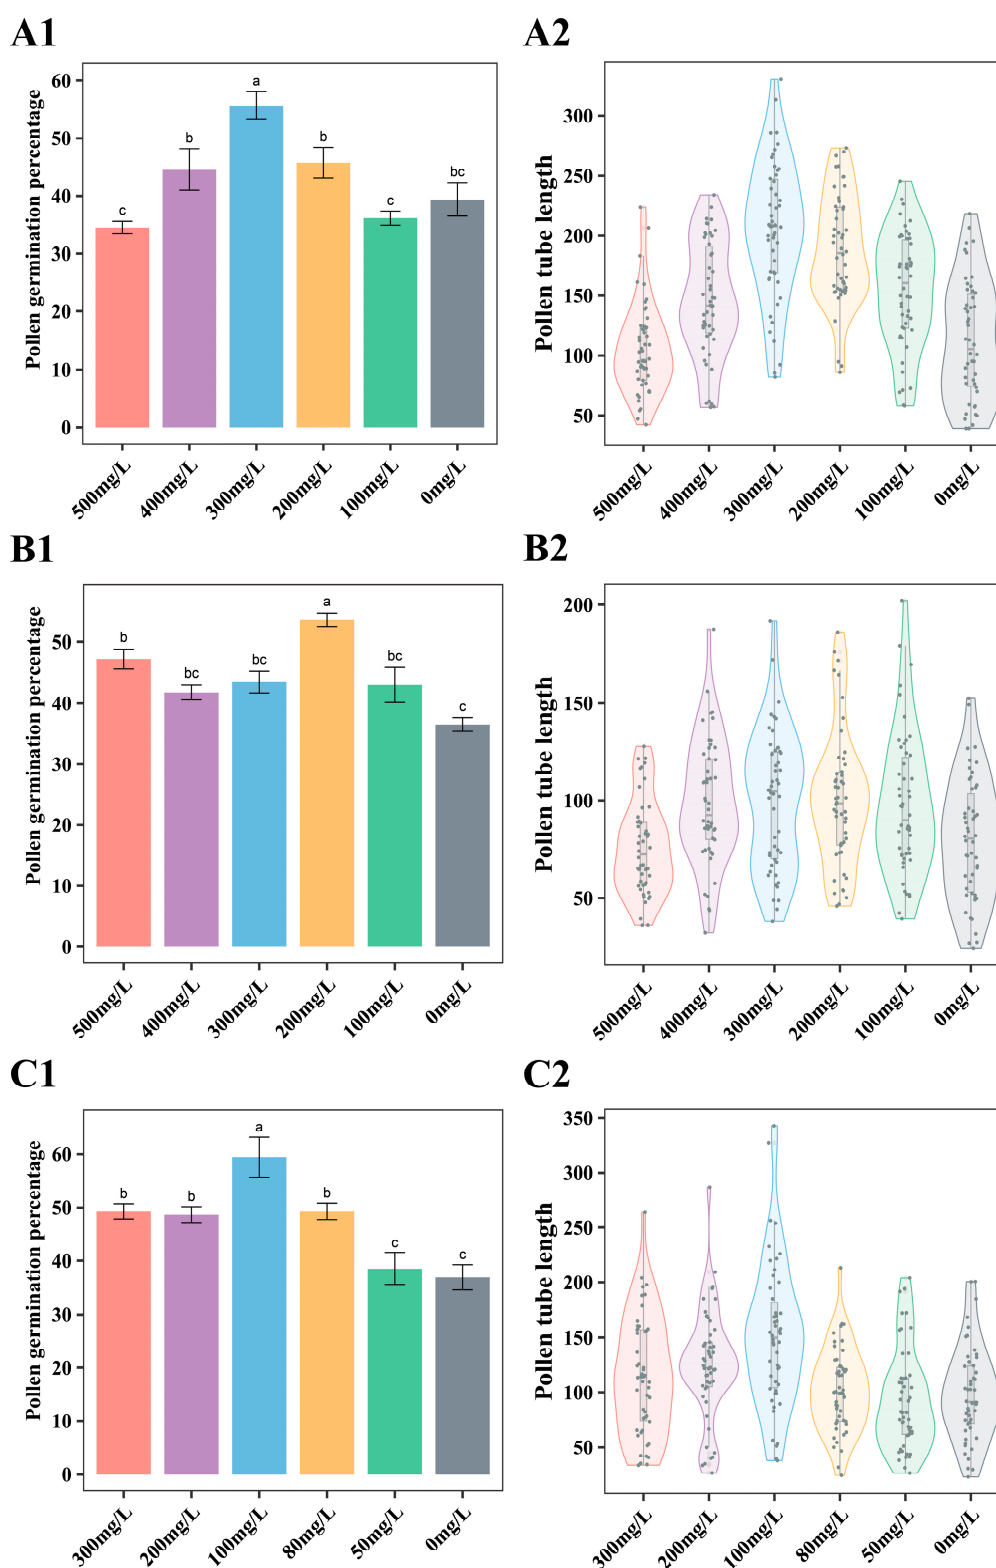

**Figure S1.** Pollen germination percentage (%) and pollen tube length (μm) of *Paeonia ostii* at different concentrations (A1-A2): Calcium nitrate; (B1-B2): Magnesium sulfate; (C1-C2): Potassium nitrate.

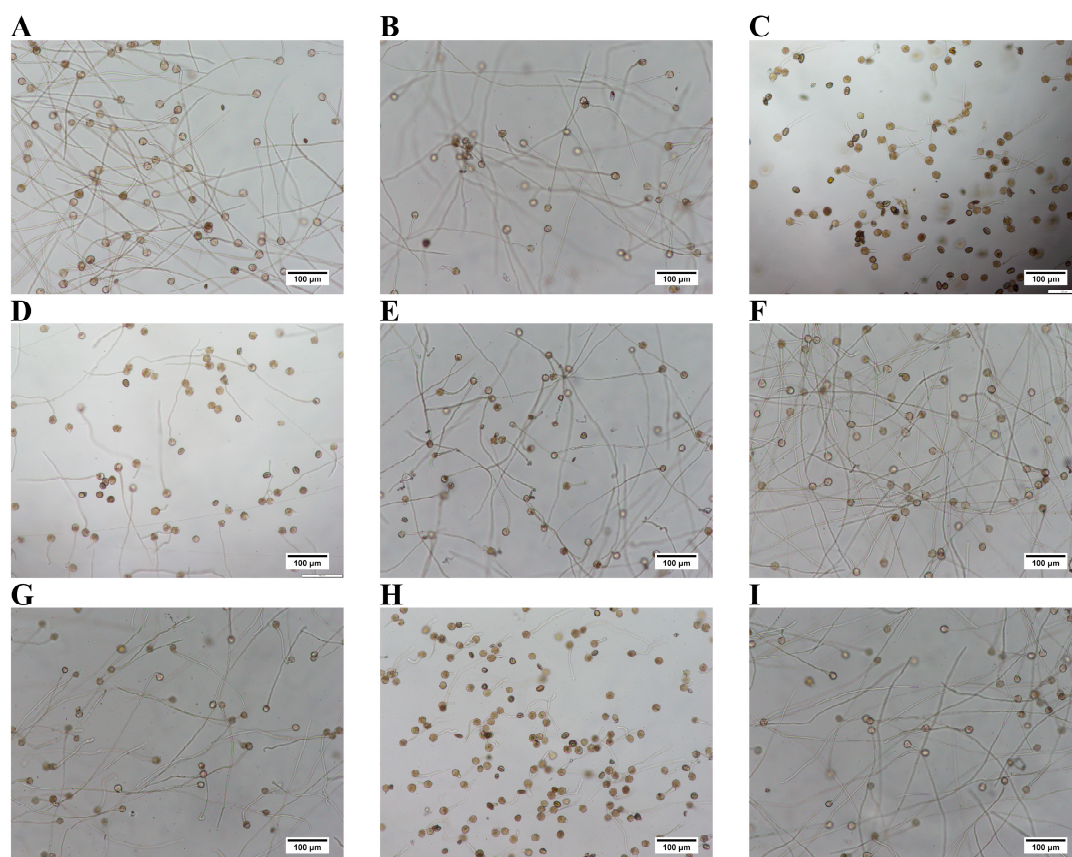

**Figure S2.** The pollen tube growth and pollen germination of *Paeonia ostii* in different mediums using an orthogonal assay test strategy (A-G represents 1-9 in Table 4). Bar=100µm.

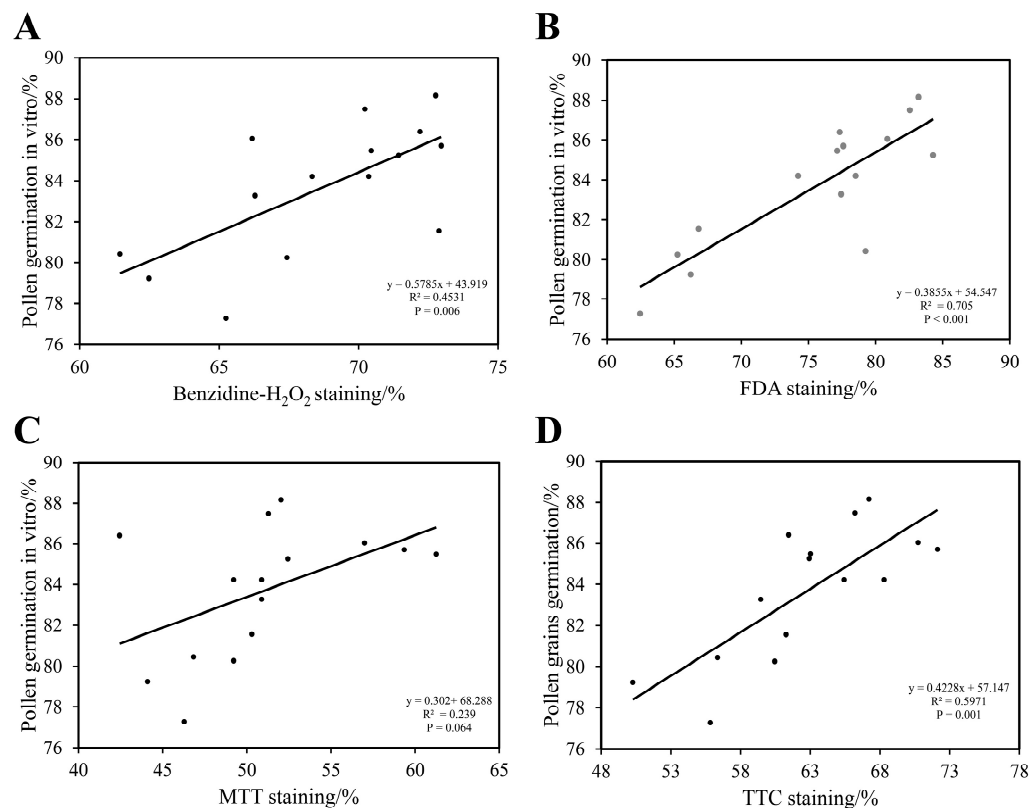

**Figure S3.** Single linear regression of pollen germination in vitro (%) relative to different pollen staining method (%) for *Paeonia ostii*. Each point represents the value of one replicate.

**Table S1.** Concentration of each component in single factor experiment with sucrose.

| Levels | Sucrose (S)<br>(g/L) | Boric acid<br>(B) (mg/L) | Calcium nitrate (Ca)<br>(mg/L) | Magnesium sul-<br>fate<br>(Mg)<br>(mg/L) | Potassium ni-<br>trate<br>(K) (mg/L) | PEG6000 (P)<br>(g/L) | pH<br>(H) |
|--------|----------------------|--------------------------|--------------------------------|------------------------------------------|--------------------------------------|----------------------|-----------|
| 1      | 200                  |                          |                                |                                          |                                      |                      |           |
| 2      | 150                  |                          |                                |                                          |                                      |                      |           |
| 3      | 100                  |                          |                                |                                          |                                      |                      |           |
| 4      | 80                   | 100                      | 300                            | 200                                      | 100                                  | 150                  | 6.2       |
| 5      | 50                   |                          |                                |                                          |                                      |                      |           |
| 6      | 0                    |                          |                                |                                          |                                      |                      |           |

**Table S2.** Concentration of each component in single factor experiment with boric acid.

| Levels | Sucrose (S)<br>(g/L) | Boric acid<br>(B) (mg/L) | Calcium nitrate (Ca)<br>(mg/L) | Magnesium sul-<br>fate<br>(Mg)<br>(mg/L) | Potassium ni-<br>trate<br>(K) (mg/L) | PEG6000 (P)<br>(g/L) | pH<br>(H) |
|--------|----------------------|--------------------------|--------------------------------|------------------------------------------|--------------------------------------|----------------------|-----------|
| 1      |                      | 300                      |                                |                                          |                                      |                      |           |
| 2      |                      | 200                      |                                |                                          |                                      |                      |           |
| 3      |                      | 100                      |                                |                                          |                                      |                      |           |
| 4      | 100                  | 80                       | 300                            | 200                                      | 100                                  | 150                  | 6.2       |
| 5      |                      | 50                       |                                |                                          |                                      |                      |           |
| 6      |                      | 0                        |                                |                                          |                                      |                      |           |

**Table S3.** Concentration of each component in single factor experiment with calcium nitrate.

| Levels | Sucrose (S)<br>(g/L) | Boric acid<br>(B) (mg/L) | Calcium nitrate (Ca)<br>(mg/L) | Magnesium sul-<br>fate<br>(Mg)<br>(mg/L) | Potassium ni-<br>trate<br>(K) (mg/L) | PEG6000 (P)<br>(g/L) | pH<br>(H) |
|--------|----------------------|--------------------------|--------------------------------|------------------------------------------|--------------------------------------|----------------------|-----------|
| 1      |                      |                          | 500                            |                                          |                                      |                      |           |
| 2      |                      |                          | 400                            |                                          |                                      |                      |           |
| 3      |                      |                          | 300                            |                                          |                                      |                      |           |
| 4      | 100                  | 100                      | 200                            | 200                                      | 100                                  | 150                  | 6.2       |
| 5      |                      |                          | 100                            |                                          |                                      |                      |           |
| 6      |                      |                          | 0                              |                                          |                                      |                      |           |

**Table S4.** Concentration of each component in single factor experiment with magnesium sulfate.

| Levels | Sucrose (S)<br>(g/L) | Boric acid<br>(B) (mg/L) | Calcium nitrate (Ca)<br>(mg/L) | Magnesium sul-<br>fate<br>(Mg)<br>(mg/L) | Potassium ni-<br>trate<br>(K) (mg/L) | PEG6000 (P)<br>(g/L) | pH<br>(H) |
|--------|----------------------|--------------------------|--------------------------------|------------------------------------------|--------------------------------------|----------------------|-----------|
| 1      |                      |                          |                                | 500                                      |                                      |                      |           |
| 2      |                      |                          |                                | 400                                      |                                      |                      |           |
| 3      |                      |                          |                                | 300                                      |                                      |                      |           |
| 4      | 100                  | 100                      | 300                            | 200                                      | 100                                  | 150                  | 6.2       |
| 5      |                      |                          |                                | 100                                      |                                      |                      |           |
| 6      |                      |                          |                                | 0                                        |                                      |                      |           |

**Table S5.** Concentration of each component in single factor experiment with potassium ni-trate.

| Levels | Sucrose (S)<br>(g/L) | Boric acid<br>(B) (mg/L) | Calcium nitrate (Ca)<br>(mg/L) | Magnesium sul-<br>fate<br>(Mg)<br>(mg/L) | Potassium ni-<br>trate<br>(K) (mg/L) | PEG6000 (P)<br>(g/L) | pH<br>(H) |
|--------|----------------------|--------------------------|--------------------------------|------------------------------------------|--------------------------------------|----------------------|-----------|
| 1      |                      |                          |                                |                                          | 300                                  |                      |           |
| 2      |                      |                          |                                |                                          | 200                                  |                      |           |
| 3      | 100                  | 100                      | 300                            |                                          | 100                                  | 150                  | 6.2       |
| 4      |                      |                          |                                | 200                                      | 80                                   |                      |           |
| 5      |                      |                          |                                |                                          | 50                                   |                      |           |
| 6      |                      |                          |                                |                                          | 0                                    |                      |           |

**Table S6.** Concentration of each component in single factor experiment with PEG6000.

| Levels | Sucrose (S)<br>(g/L) | Boric acid<br>(B) (mg/L) | Calcium nitrate (Ca)<br>(mg/L) | Magnesium sul-<br>fate<br>(Mg)<br>(mg/L) | Potassium ni-<br>trate<br>(K) (mg/L) | PEG6000 (P)<br>(g/L) | pH<br>(H) |
|--------|----------------------|--------------------------|--------------------------------|------------------------------------------|--------------------------------------|----------------------|-----------|
| 1      |                      |                          |                                |                                          |                                      | 250                  |           |
| 2      |                      |                          |                                |                                          |                                      | 200                  |           |
| 3      | 100                  | 100                      | 300                            | 200                                      | 100                                  | 150                  | 6.2       |
| 4      |                      |                          |                                |                                          |                                      | 100                  |           |
| 5      |                      |                          |                                |                                          |                                      | 50                   |           |
| 6      |                      |                          |                                |                                          |                                      | 0                    |           |

**Table S7.** Concentration of each component in single factor experiment with pH.

| Levels | Sucrose (S)<br>(g/L) | Boric acid<br>(B) (mg/L) | Calcium nitrate (Ca)<br>(mg/L) | Magnesium sul-<br>fate<br>(Mg)<br>(mg/L) | Potassium ni-<br>trate<br>(K) (mg/L) | PEG6000 (P)<br>(g/L) | pH<br>(H) |
|--------|----------------------|--------------------------|--------------------------------|------------------------------------------|--------------------------------------|----------------------|-----------|
| 1      |                      |                          |                                |                                          |                                      |                      | 5.4       |
| 2      |                      |                          |                                |                                          |                                      |                      | 5.8       |
| 3      | 100                  | 100                      | 300                            | 200                                      | 100                                  | 150                  | 6.2       |
| 4      |                      |                          |                                |                                          |                                      |                      | 7.5       |
| 5      |                      |                          |                                |                                          |                                      |                      | 8.4       |
| 6      |                      |                          |                                |                                          |                                      |                      | 9.6       |

**Disclaimer/Publisher's Note:** The statements, opinions and data contained in all publications are solely those of the individual author(s) and contributor(s) and not of MDPI and/or the editor(s). MDPI and/or the editor(s) disclaim responsibility for any injury to people or property resulting from any ideas, methods, instructions or products referred to in the content.
